# Supplementary material for: Effect of Dietary Chlorella vulgaris or Tetradesmus obliquus on Laying Performance and Intestinal Immune Cell Parameters
Source: MDPI journal article supplement (doi:10.3390/ani13101589), 2023-05-09
Supplement: s1 [file s1]

(A)

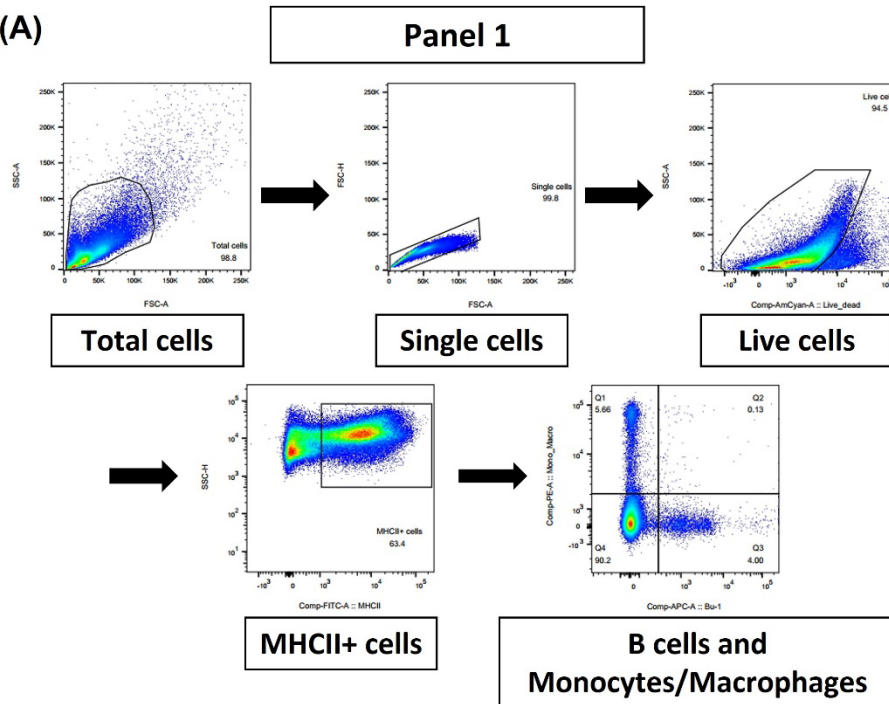

(B)

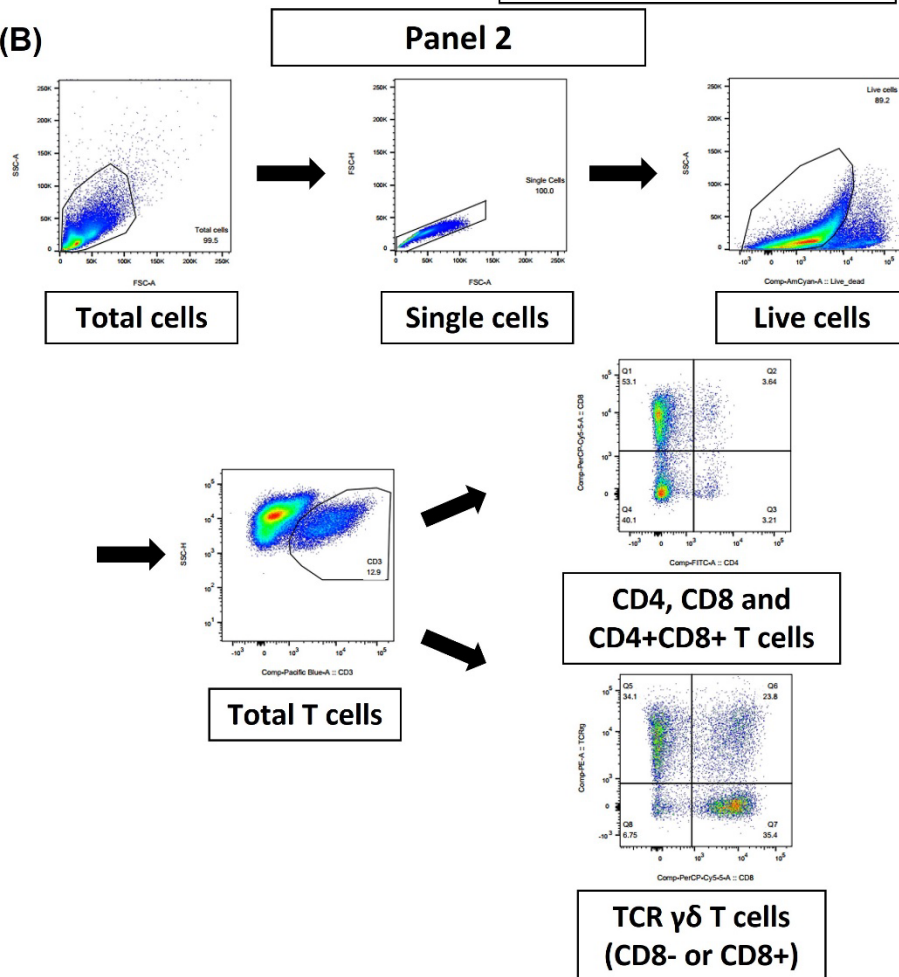

**Supplementary Figure 1.** Flow cytometry gating strategy in this study. All samples were analyzed single cells and live cells before main analysis. B cells and Monocytes/Macrophage were gated on panel 1 (A) and T cells were gated on panel 2 (B).
